# Supplementary material for: Linking molecular/ion structure, solvent mesostructure, the solvophobic effect and the ability of amphiphiles to self-assemble in non-aqueous liquids
Source: Royal Society of Chemistry journal article supplement (doi:10.1039/c3fd00077j), 2013-01-01
Supplement: c3fd00077j.pdf [file c3fd00077j.pdf]

## Linking molecular/ion structure, solvent mesostructure, the solvophobic effect and the ability of amphiphiles to self-assemble in non-aqueous liquids

Emmy C. Wijaya,<sup>1,2</sup> Tamar L. Greaves<sup>2</sup> and Calum J. Drummond<sup>2</sup>

<sup>1</sup> School of Chemistry, The University of Melbourne, Parkville VIC 3010, Australia

<sup>2</sup> CSIRO Materials Science and Engineering, Bag 10, Clayton VIC 3169, Australia

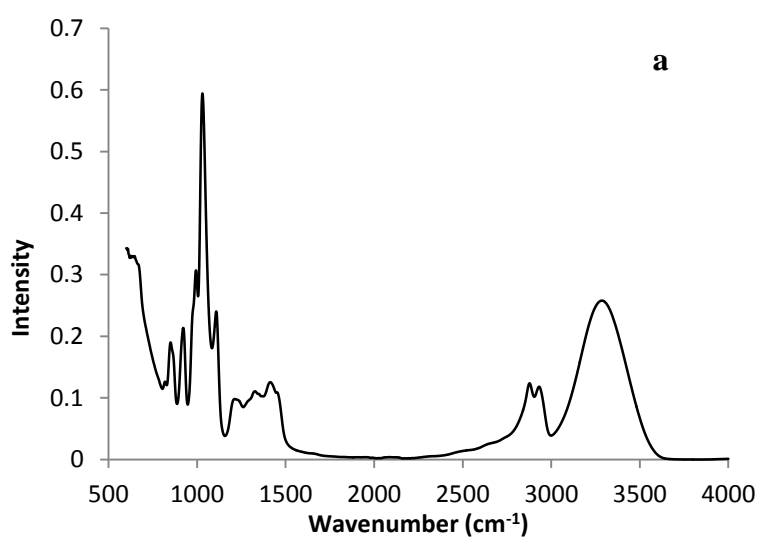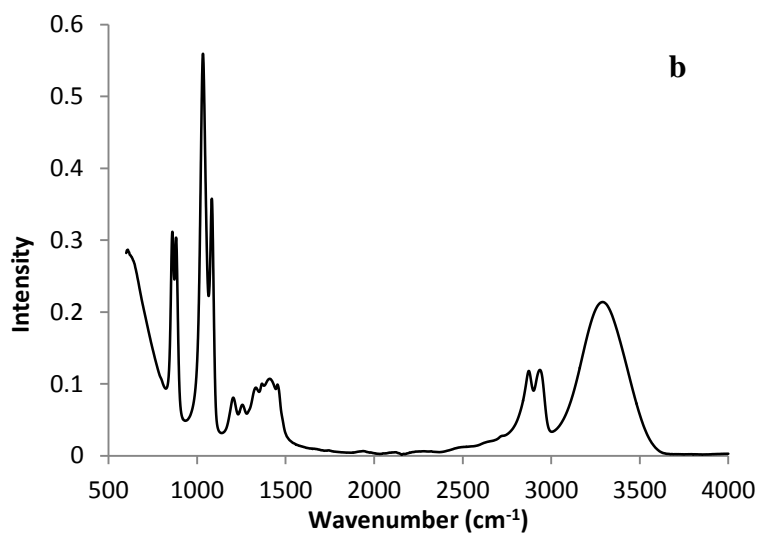

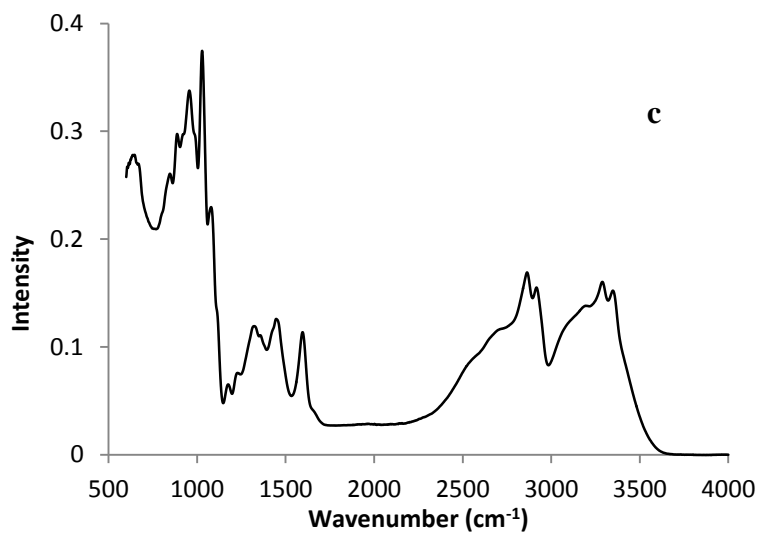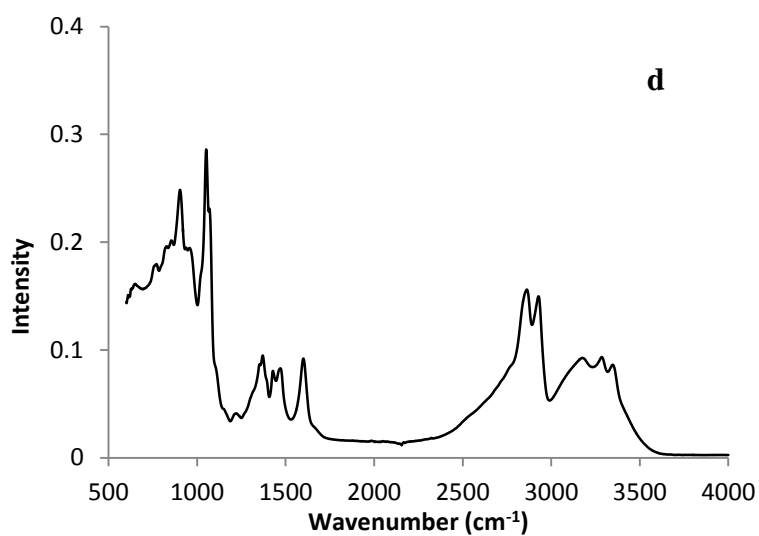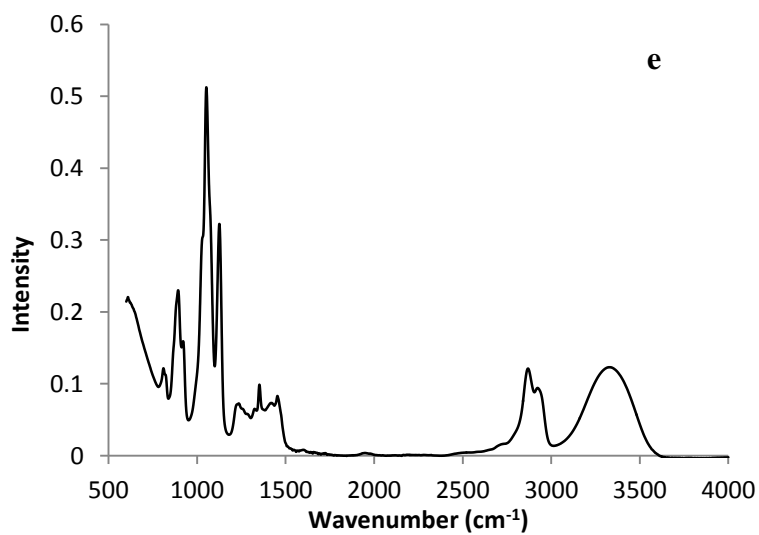

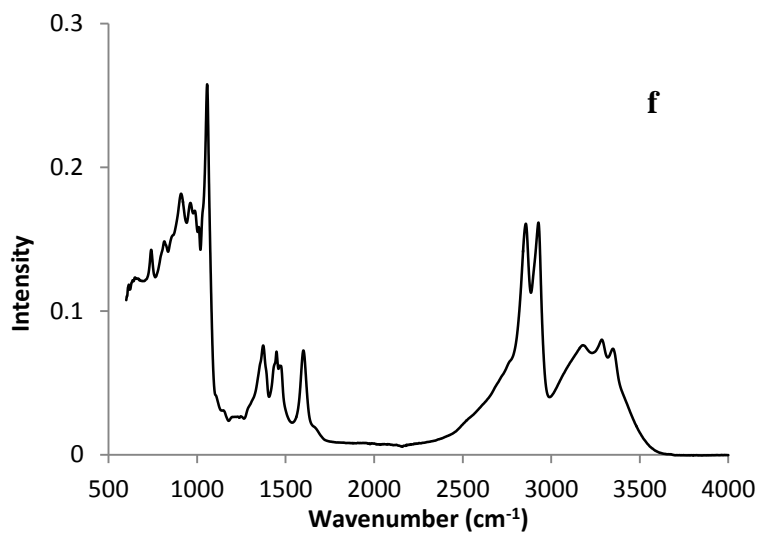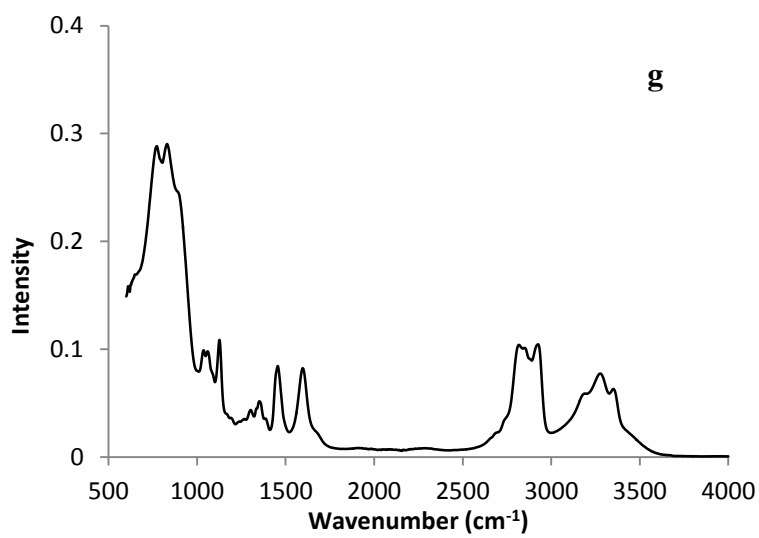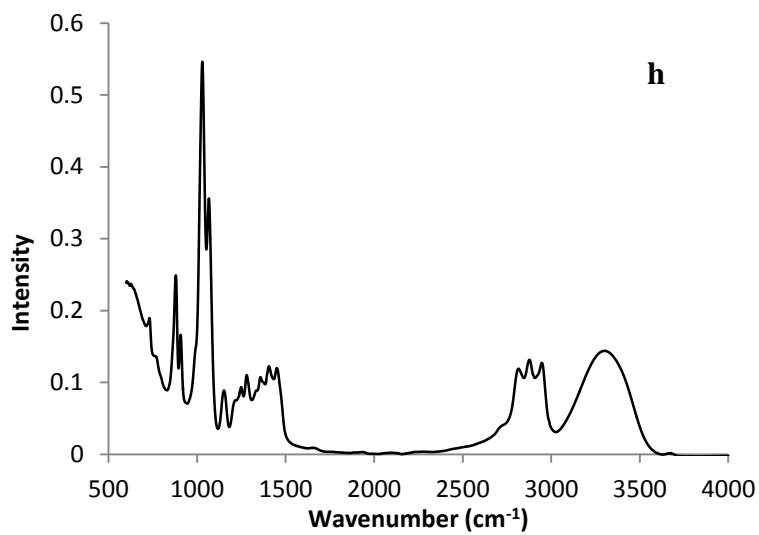

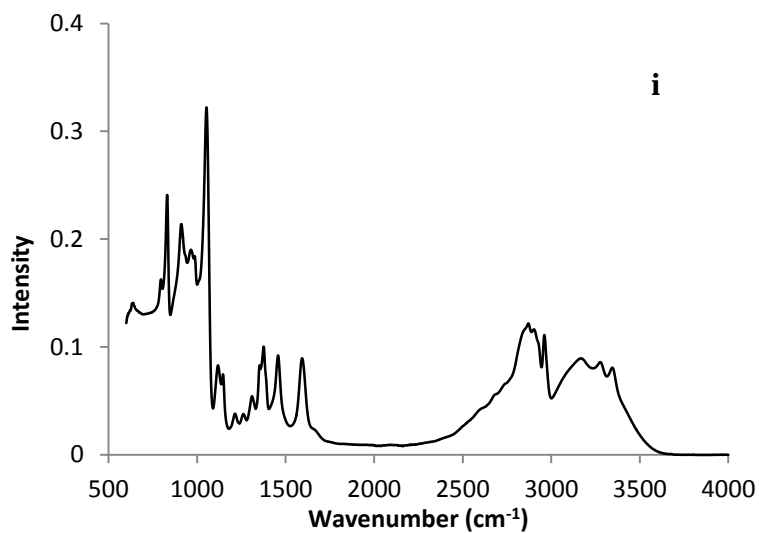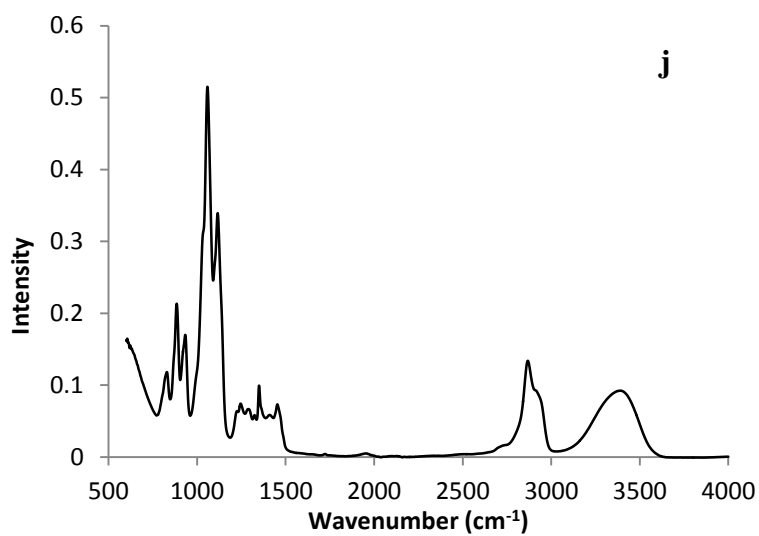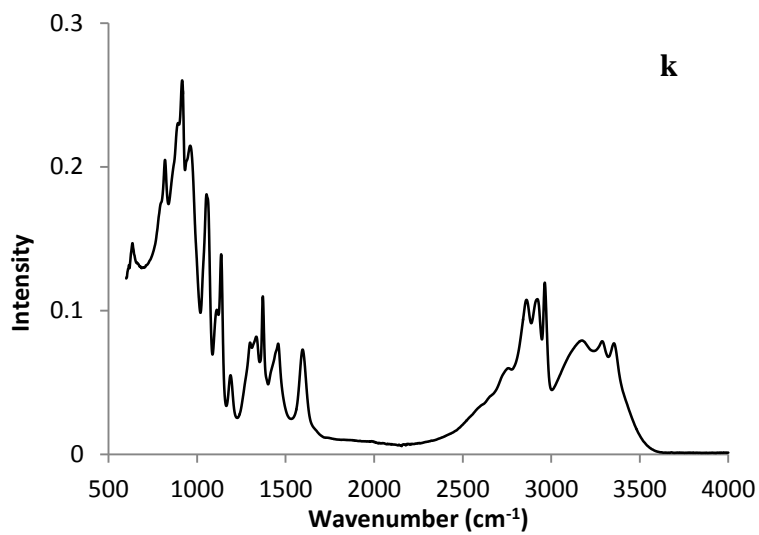

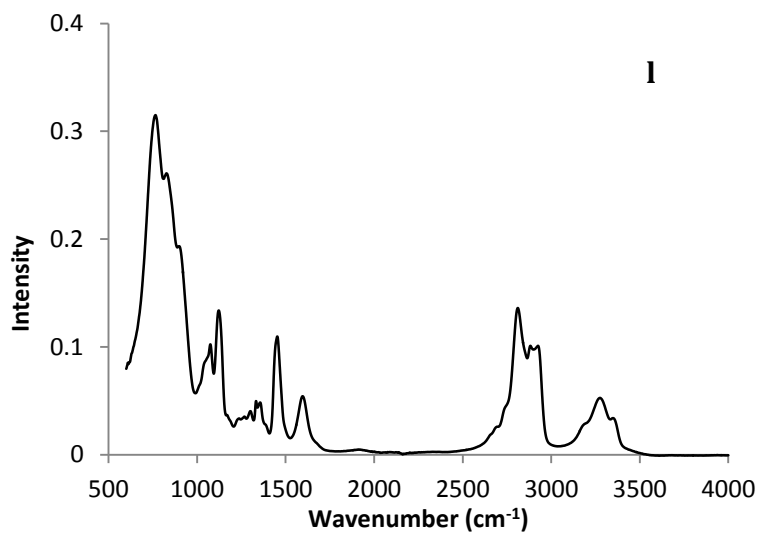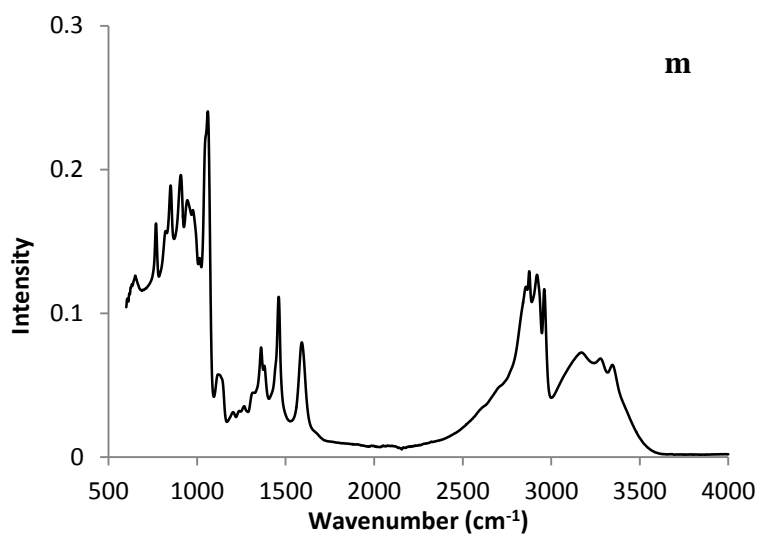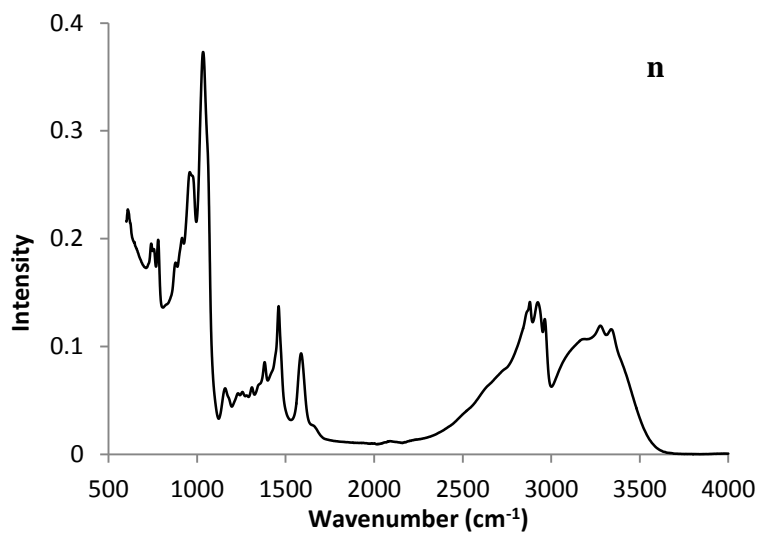

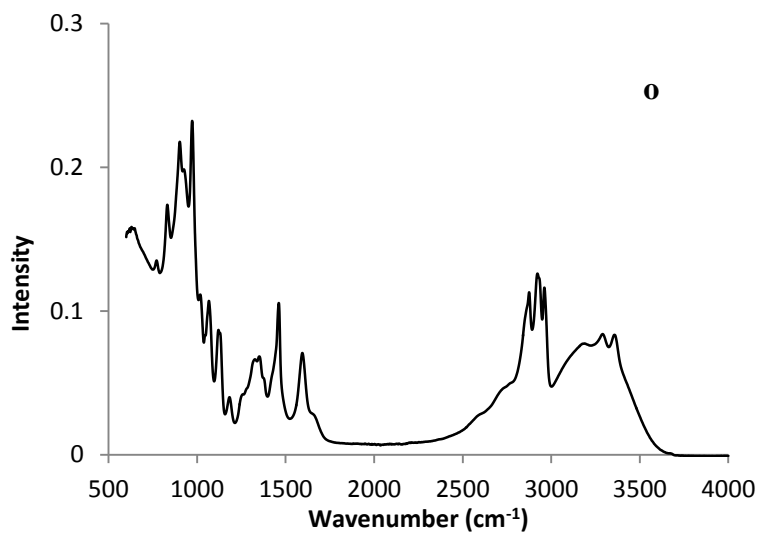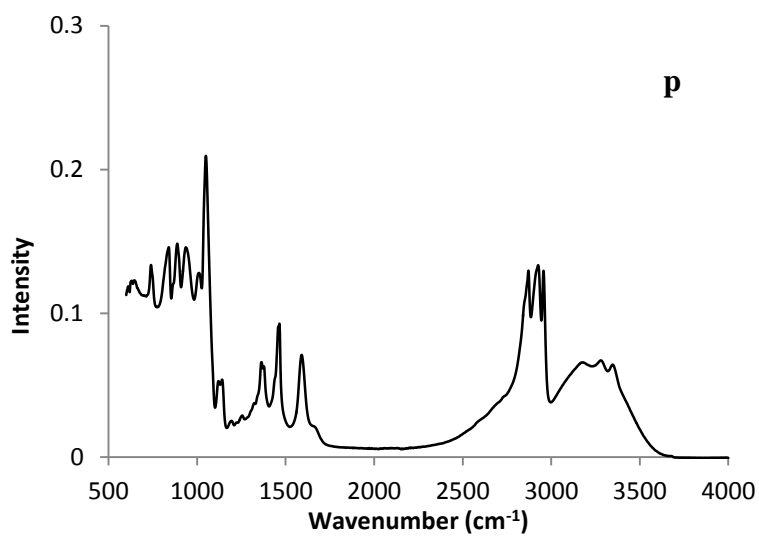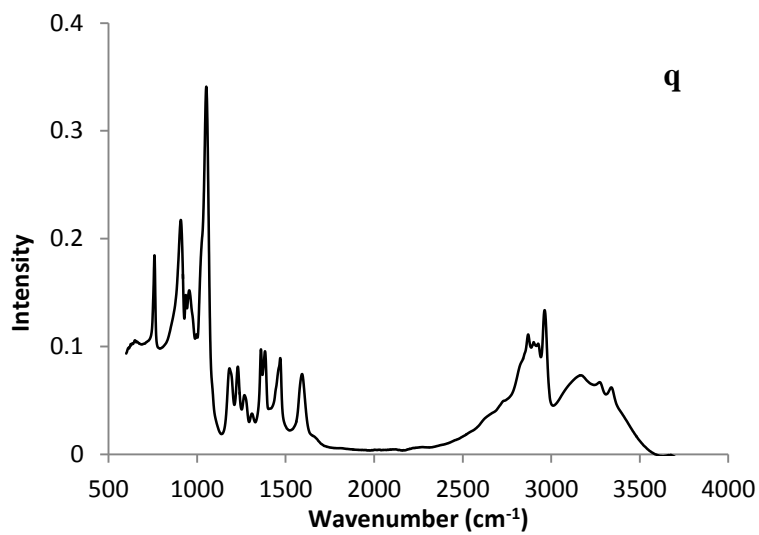

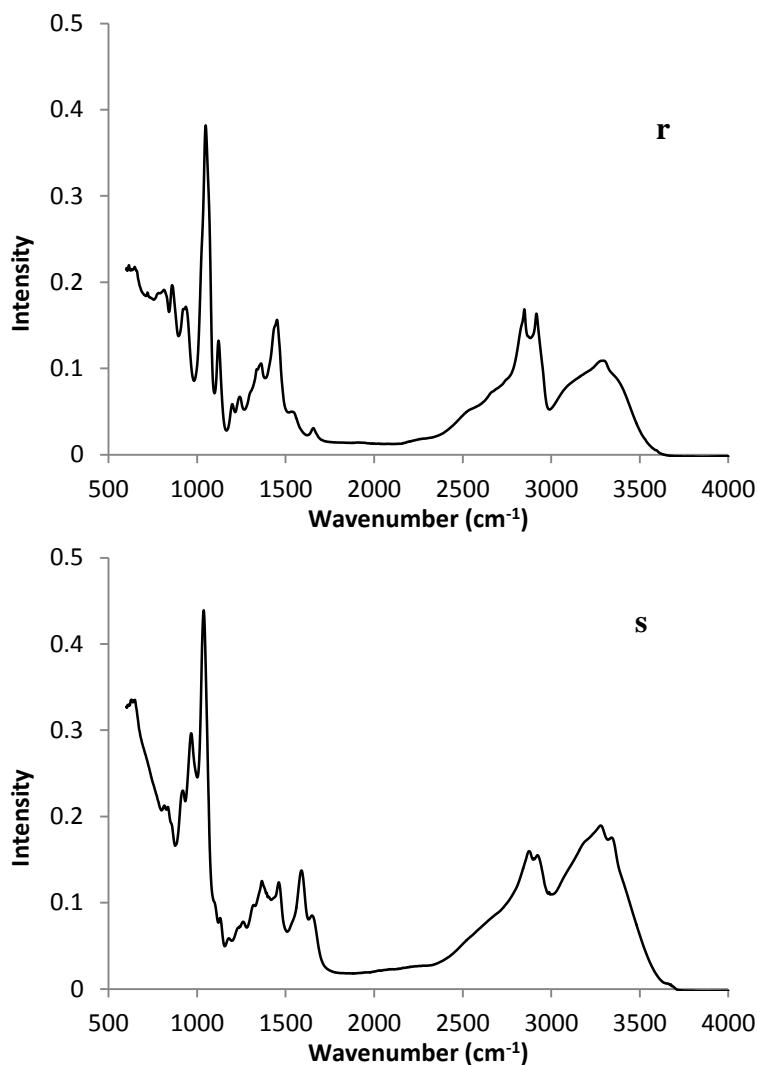

**Figure S1.** IR spectra of the solvents of a) glycerol, b) ethylene glycol, c) 3-amino-1,2-propanediol, d) 3-amino-1-propanol, e) diethylene glycol, f) 4-amino-1-butanol, g) diethylene triamine, h) triethanolamine, i) 2-amino-1-propanol, j) triethylene glycol, k) 1-amino-2-propanol, l) triethylene tetramine, m) 2-amino-1-butanol, n) 2-amino-2-ethyl-1,3-propanediol, o) 1-amino-2-butanol, p) 2-amino-1-pentanol, q) 2-amino-2-methyl-1-propanol, r) diethanolamine, s) 2-amino-1,3-propanediol.

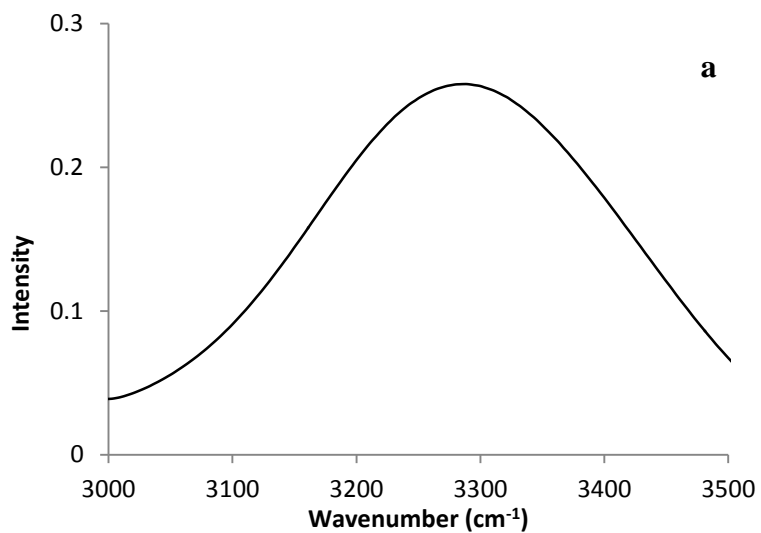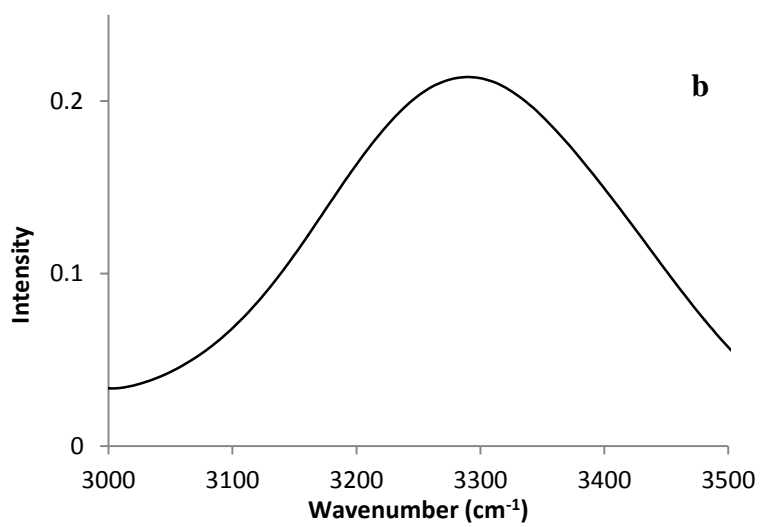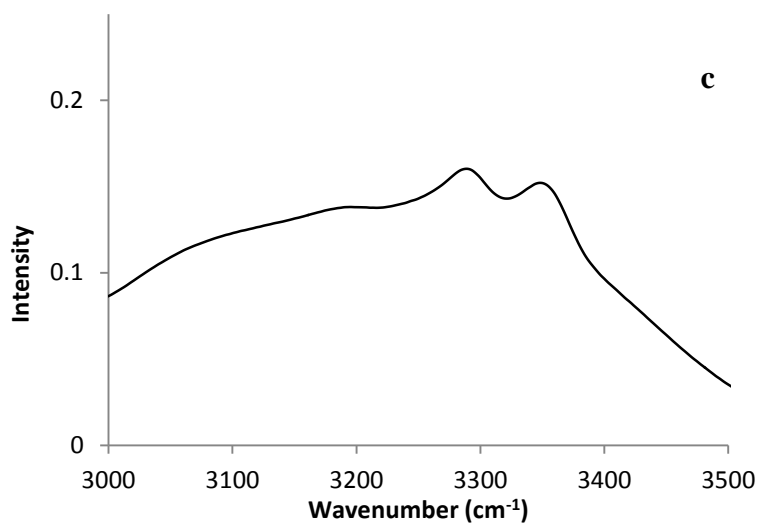



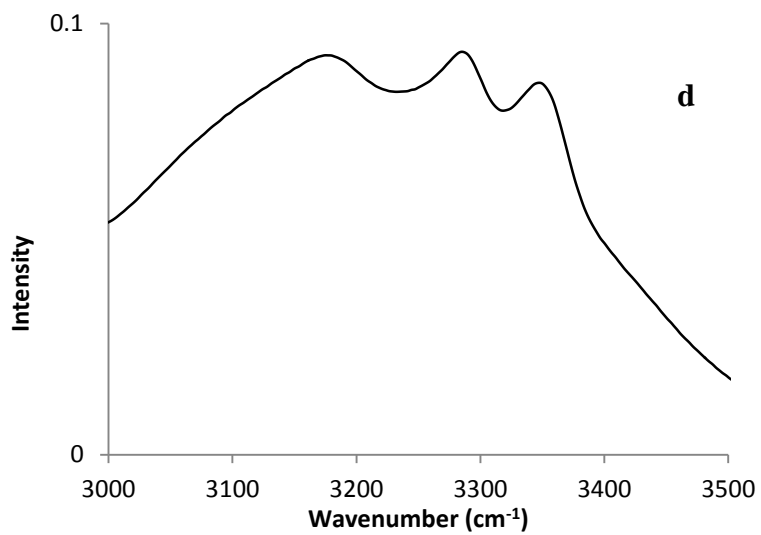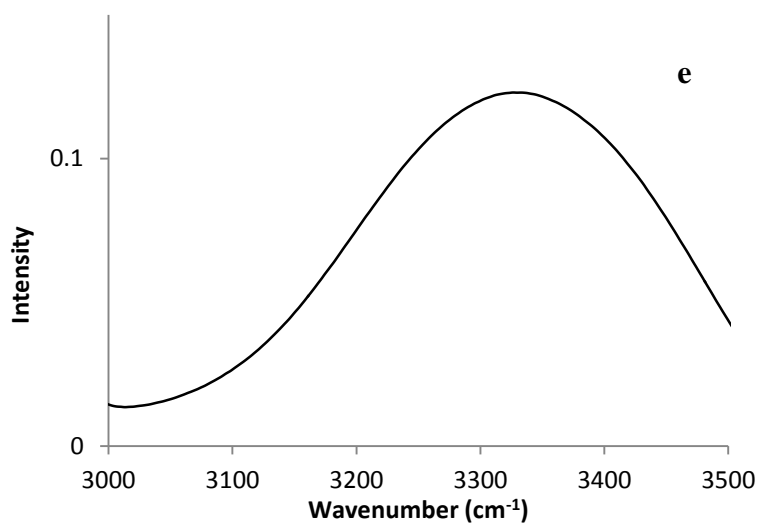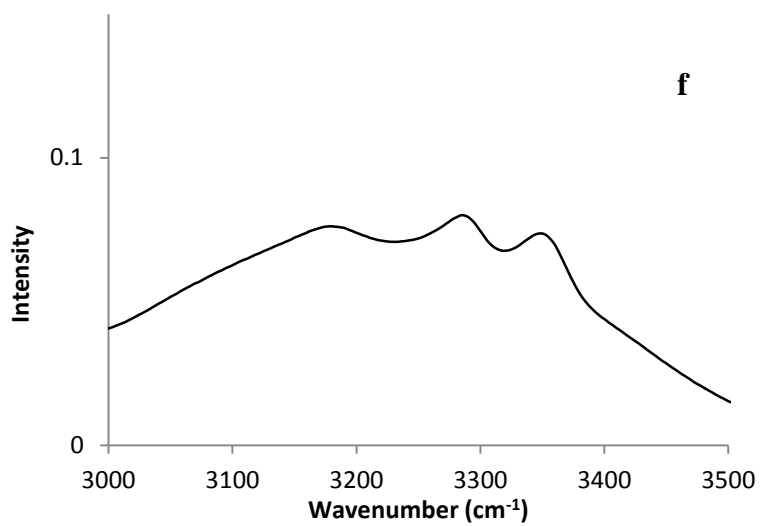

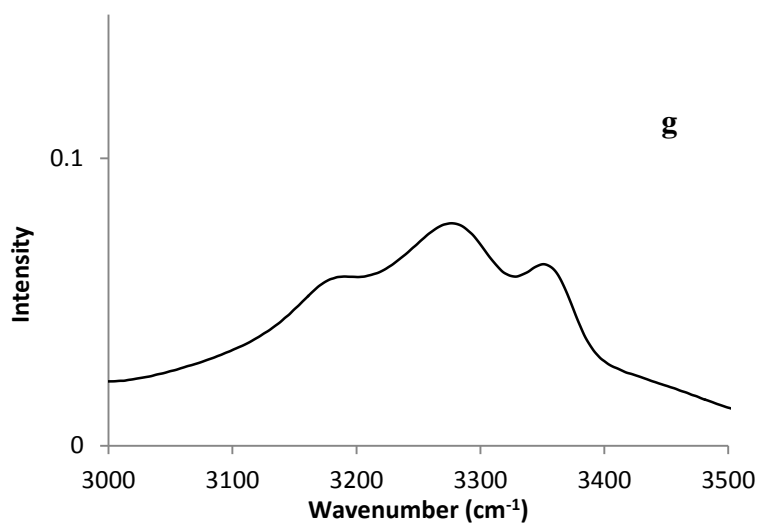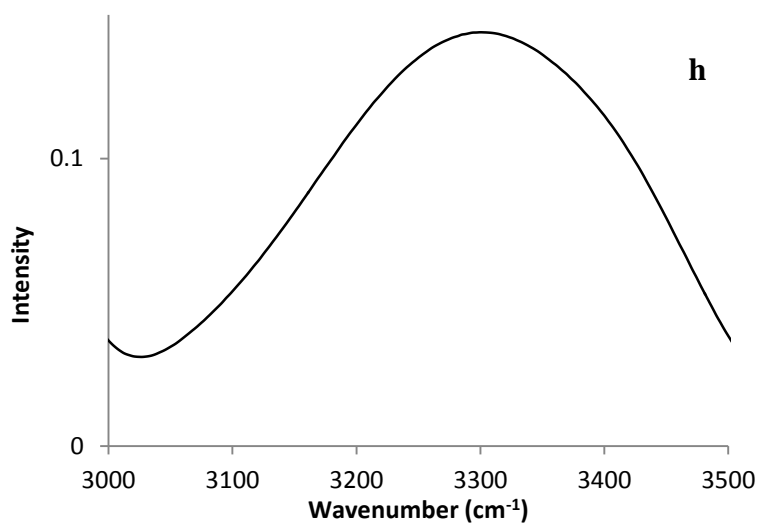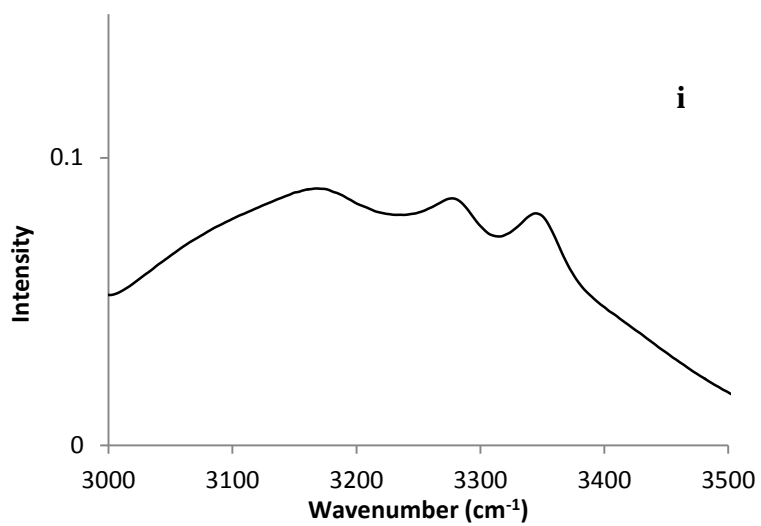

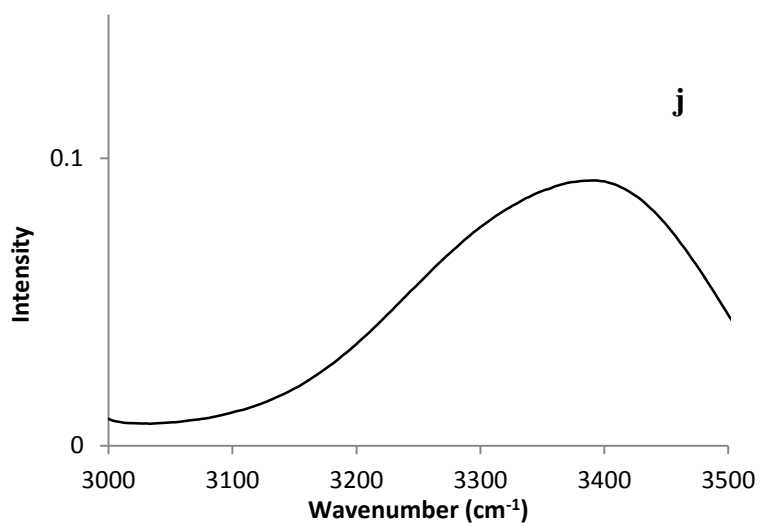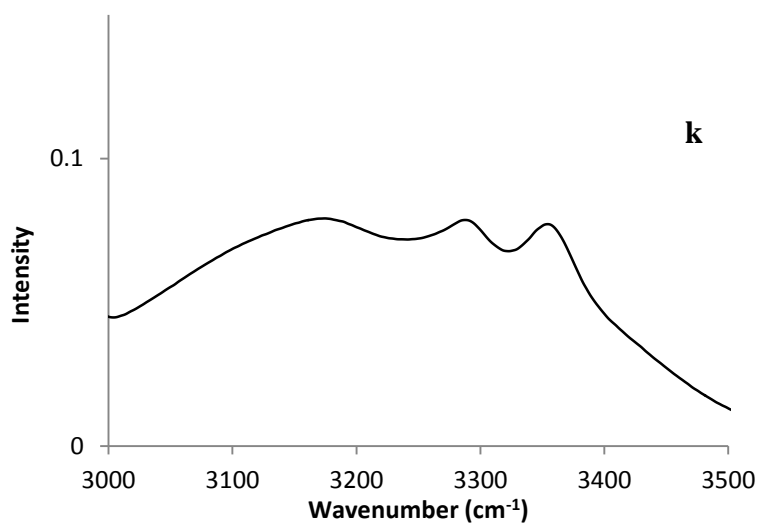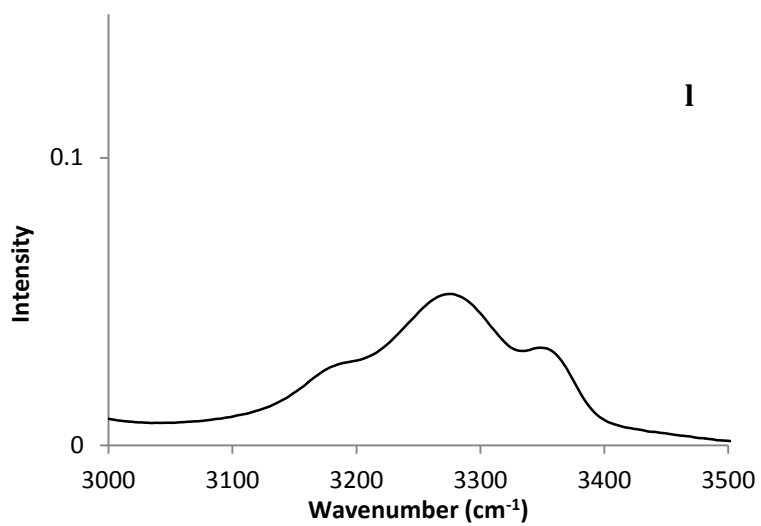

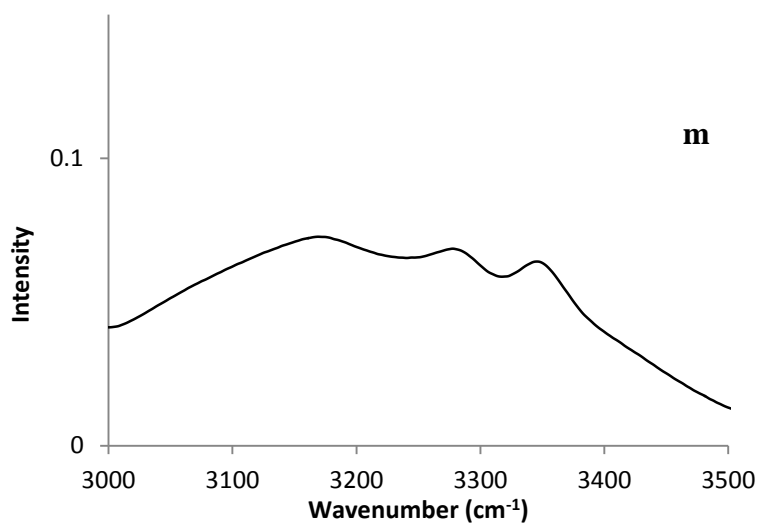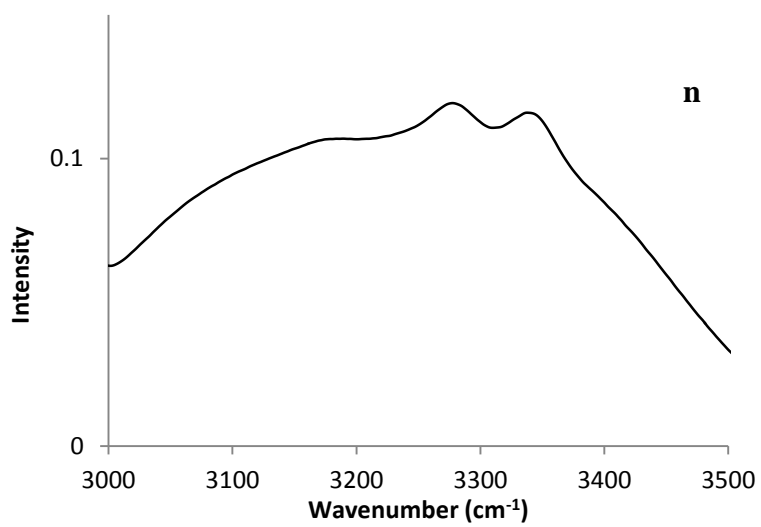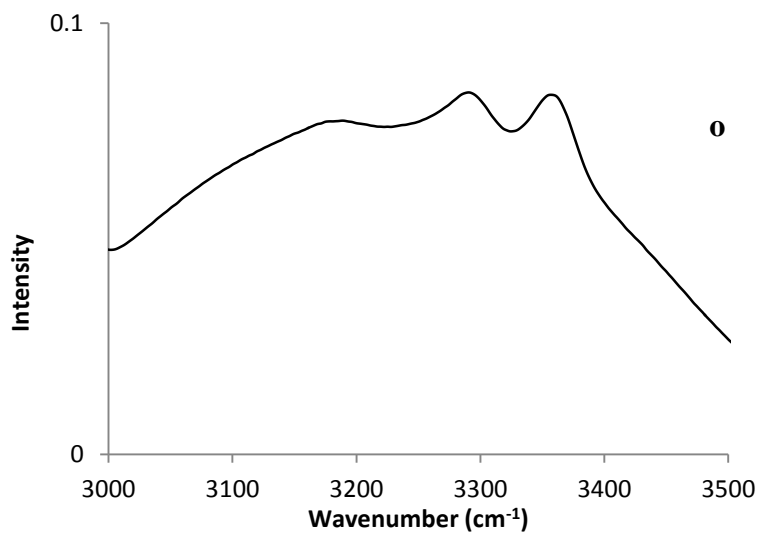

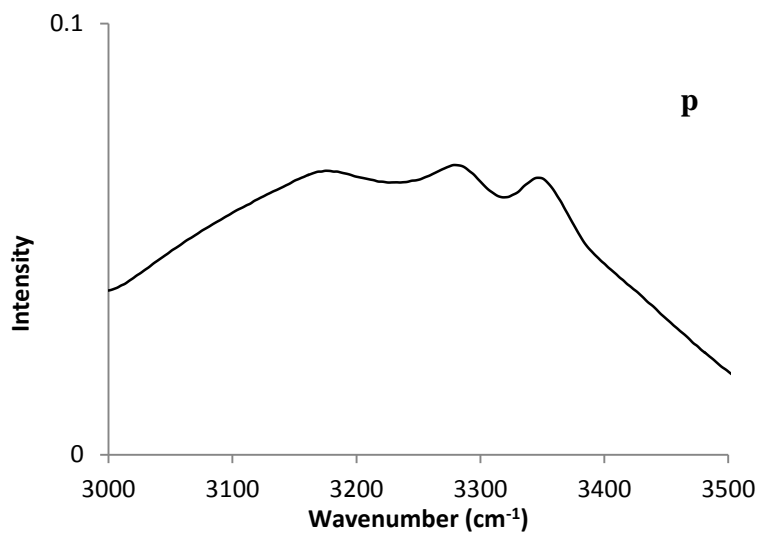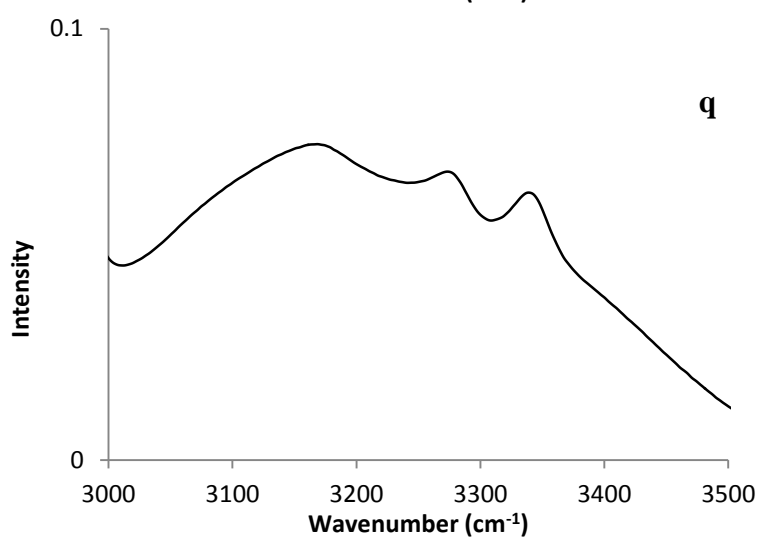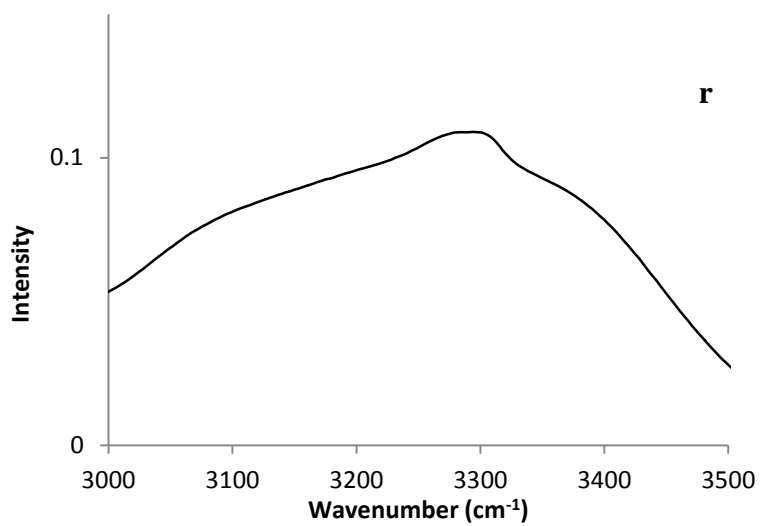

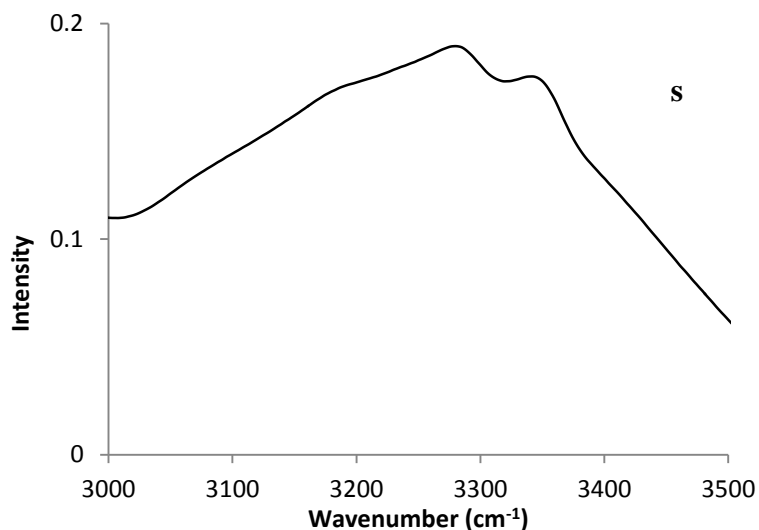

**Figure S2.** IR spectra between 3000 and 3500  $\text{cm}^{-1}$  of the solvents of a) glycerol, b) ethylene glycol, c) 3-amino-1,2-propanediol, d) 3-amino-1-propanol, e) diethylene glycol, f) 4-amino-1-butanol, g) diethylene triamine, h) triethanolamine, i) 2-amino-1-propanol, j) triethylene glycol, k) 1-amino-2-propanol, l) triethylene tetramine, m) 2-amino-1-butanol, n) 2-amino-2-ethyl-1,3-propanediol, o) 1-amino-2-butanol, p) 2-amino-1-pentanol, q) 2-amino-2-methyl-1-propanol, r) diethanolamine, s) 2-amino-1,3-propanediol.
